# Supplementary material for: Exploiting the photocatalytic activity of TiO2 towards the depolymerization of Kraft lignin
Source: Royal Society of Chemistry journal article supplement (doi:10.1039/d1nj03043d), 2021-01-01
Supplement: d1nj03043d1.pdf [file d1nj03043d1.pdf]

## Supporting Information

### Exploiting the Photocatalytic Activity of TiO<sub>2</sub> Towards the Depolymerization of Kraft Lignin

Charles-Oneil L. Crites,<sup>\*a</sup> Fernanda Gomes de Mendonça,<sup>b</sup> José Carlos Netto-Ferreira,<sup>c-d</sup> R. Tom Baker,<sup>b</sup>  
Geniece L. Hallett-Tapley<sup>e</sup> and Luc Tremblay<sup>f</sup>

---

<sup>a</sup>Secteur Science, Université de Moncton, Edmundston, New Brunswick, Canada, E3V 2S8

<sup>b</sup>Department of Chemistry and Biomolecular Sciences and Centre for Catalysis Research and Innovation, University of Ottawa, Ottawa, Ontario K1N 6N5, Canada

<sup>c</sup>Department of Organic Chemistry, Universidade Federal Rural do Rio de Janeiro, Seropédica, Rio de Janeiro, 23890-000, Brazil

---

<sup>d</sup> Department of Organic Chemistry, Federal University of Rio de Janeiro, CT, Block A, Cidade Universitária, 21941-909, Rio de Janeiro, RJ, Brazil

<sup>e</sup>Department of Chemistry, St. Francis Xavier University, P.O. Box 5000, Antigonish, NS, Canada B2G 2W5

<sup>f</sup>Department of Chemistry and Biochemistry, Université de Moncton, Moncton, New Brunswick, Canada E1A 3E9

---

\*Corresponding author: charles-oneil.crites@umoncton.ca

**Table of Contents:**

**Figure S1:**  $^1\text{H}$  NMR of Kraft lignin, oxidized Kraft lignin, UV treated Kraft Lignin and UV treated Kraft lignin in the presence of  $\text{TiO}_2$  .....3

**Figure S2:** Chromatogram of the oxidized lignin products generated in the presence of AuNP/HT catalyst and chemical structure of three identified products..... 4

**Figure S3:** Chromatogram of the oxidized lignin products generated under UV irradiation and chemical structure of two identified products.....4

**Figure S4:** Chromatogram of lignin oxidized under UV irradiation in the presence of  $\text{TiO}_2$  and chemical structure of four identified products..... 5

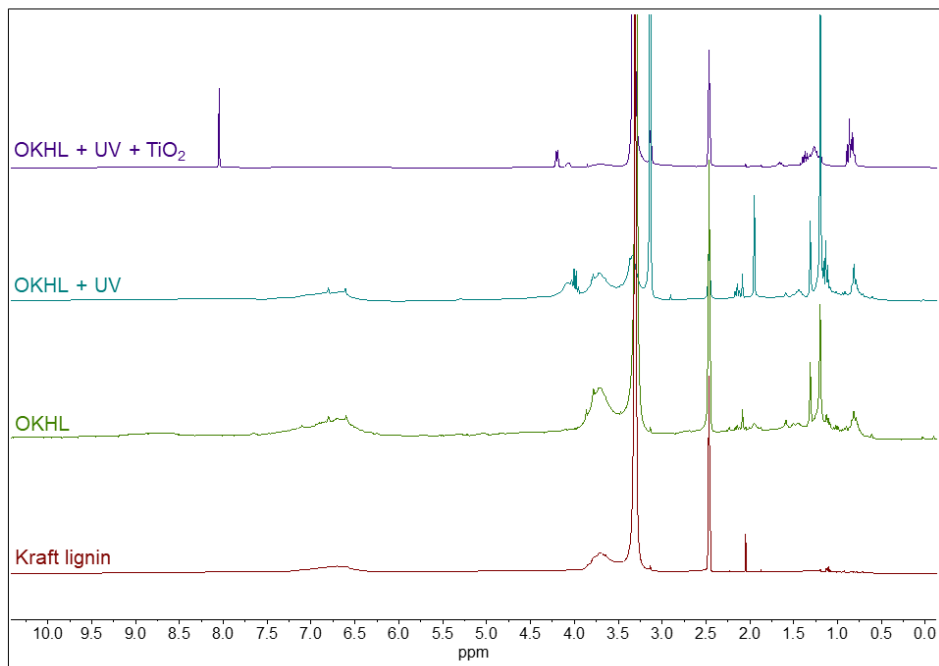

**Figure S1:** <sup>1</sup>H NMR of Kraft lignin, oxidized Kraft lignin, UV treated Kraft Lignin and UV treated Kraft lignin in the presence of TiO<sub>2</sub>.

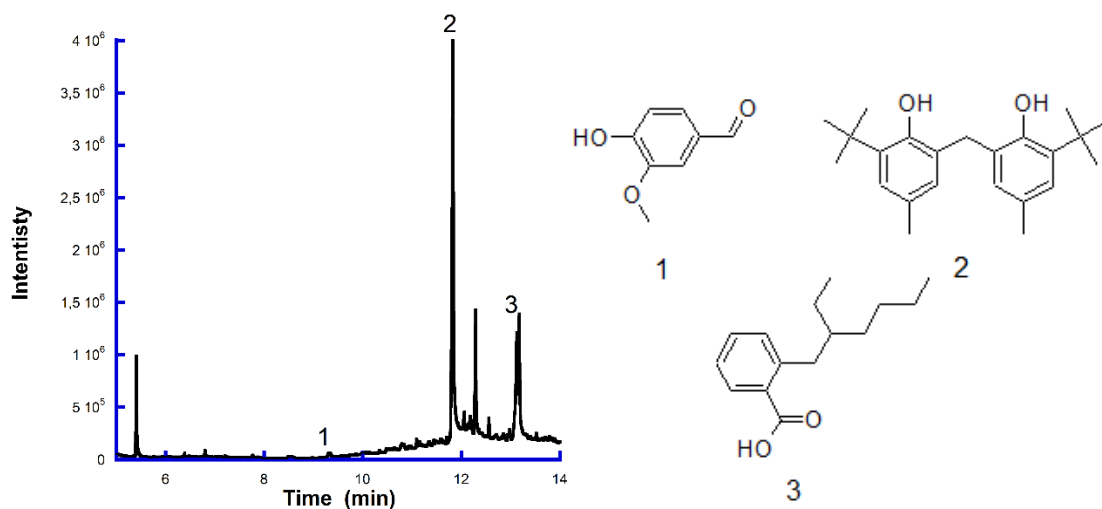

**Figure S2:** Chromatogram of the oxidized lignin products generated in the presence of AuNP/HT catalyst and chemical structure of three identified products.

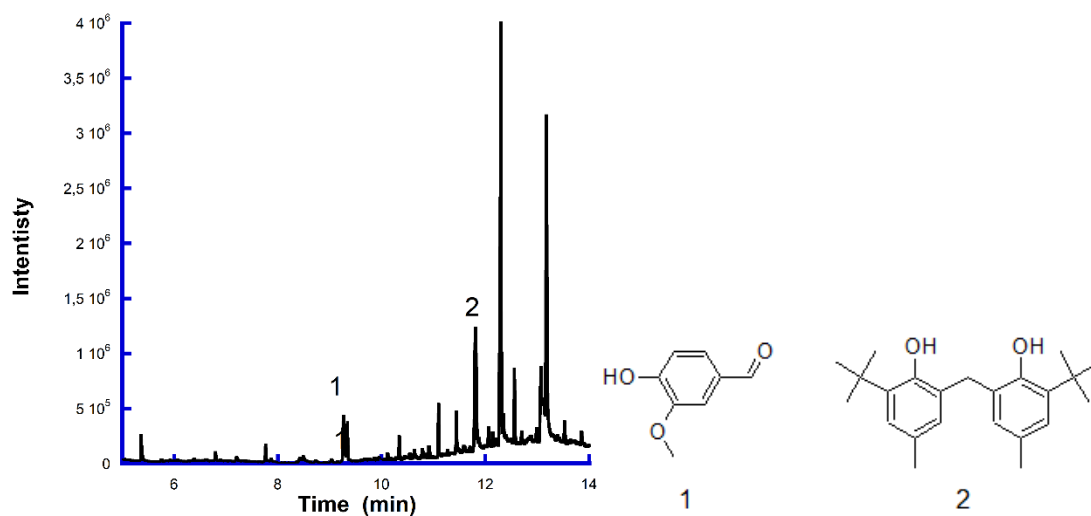

**Figure S3:** Chromatogram of the oxidized lignin products generated under UV irradiation and chemical structure of two identified products.

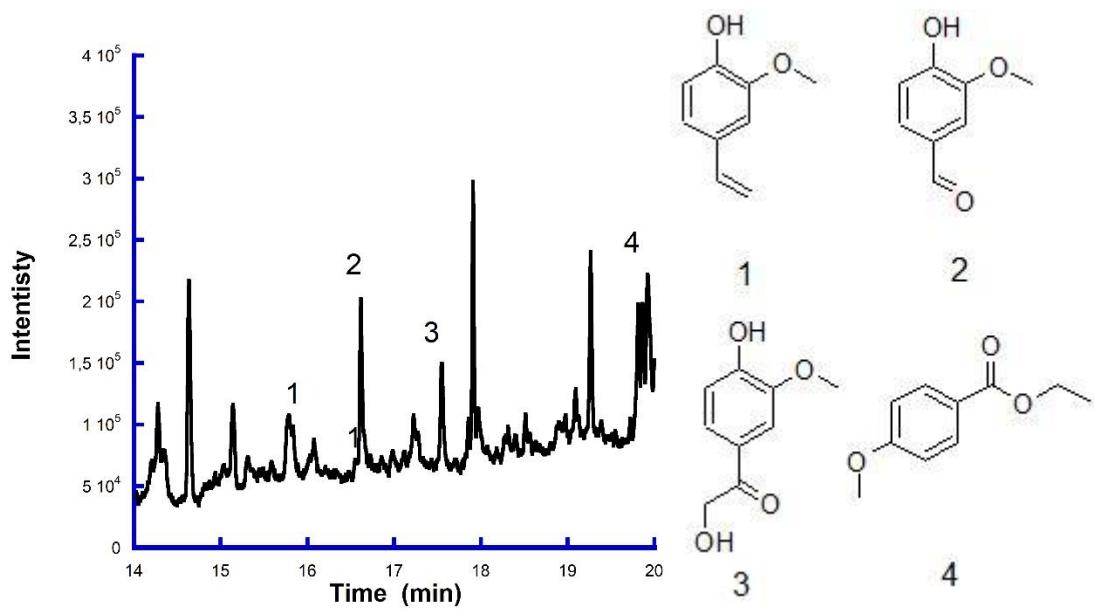

**Figure S4:** Chromatogram of lignin oxidized under UV irradiation in the presence of TiO<sub>2</sub> and chemical structure of four identified products.
